# Supplementary material for: Unconditional and conditional standards for fetal abdominal circumference and estimated fetal weight in an ethnic Chinese population: a birth cohort study
Source: Springer Nature journal article supplement (doi:10.1186/s12884-015-0569-1), 2015-06-24

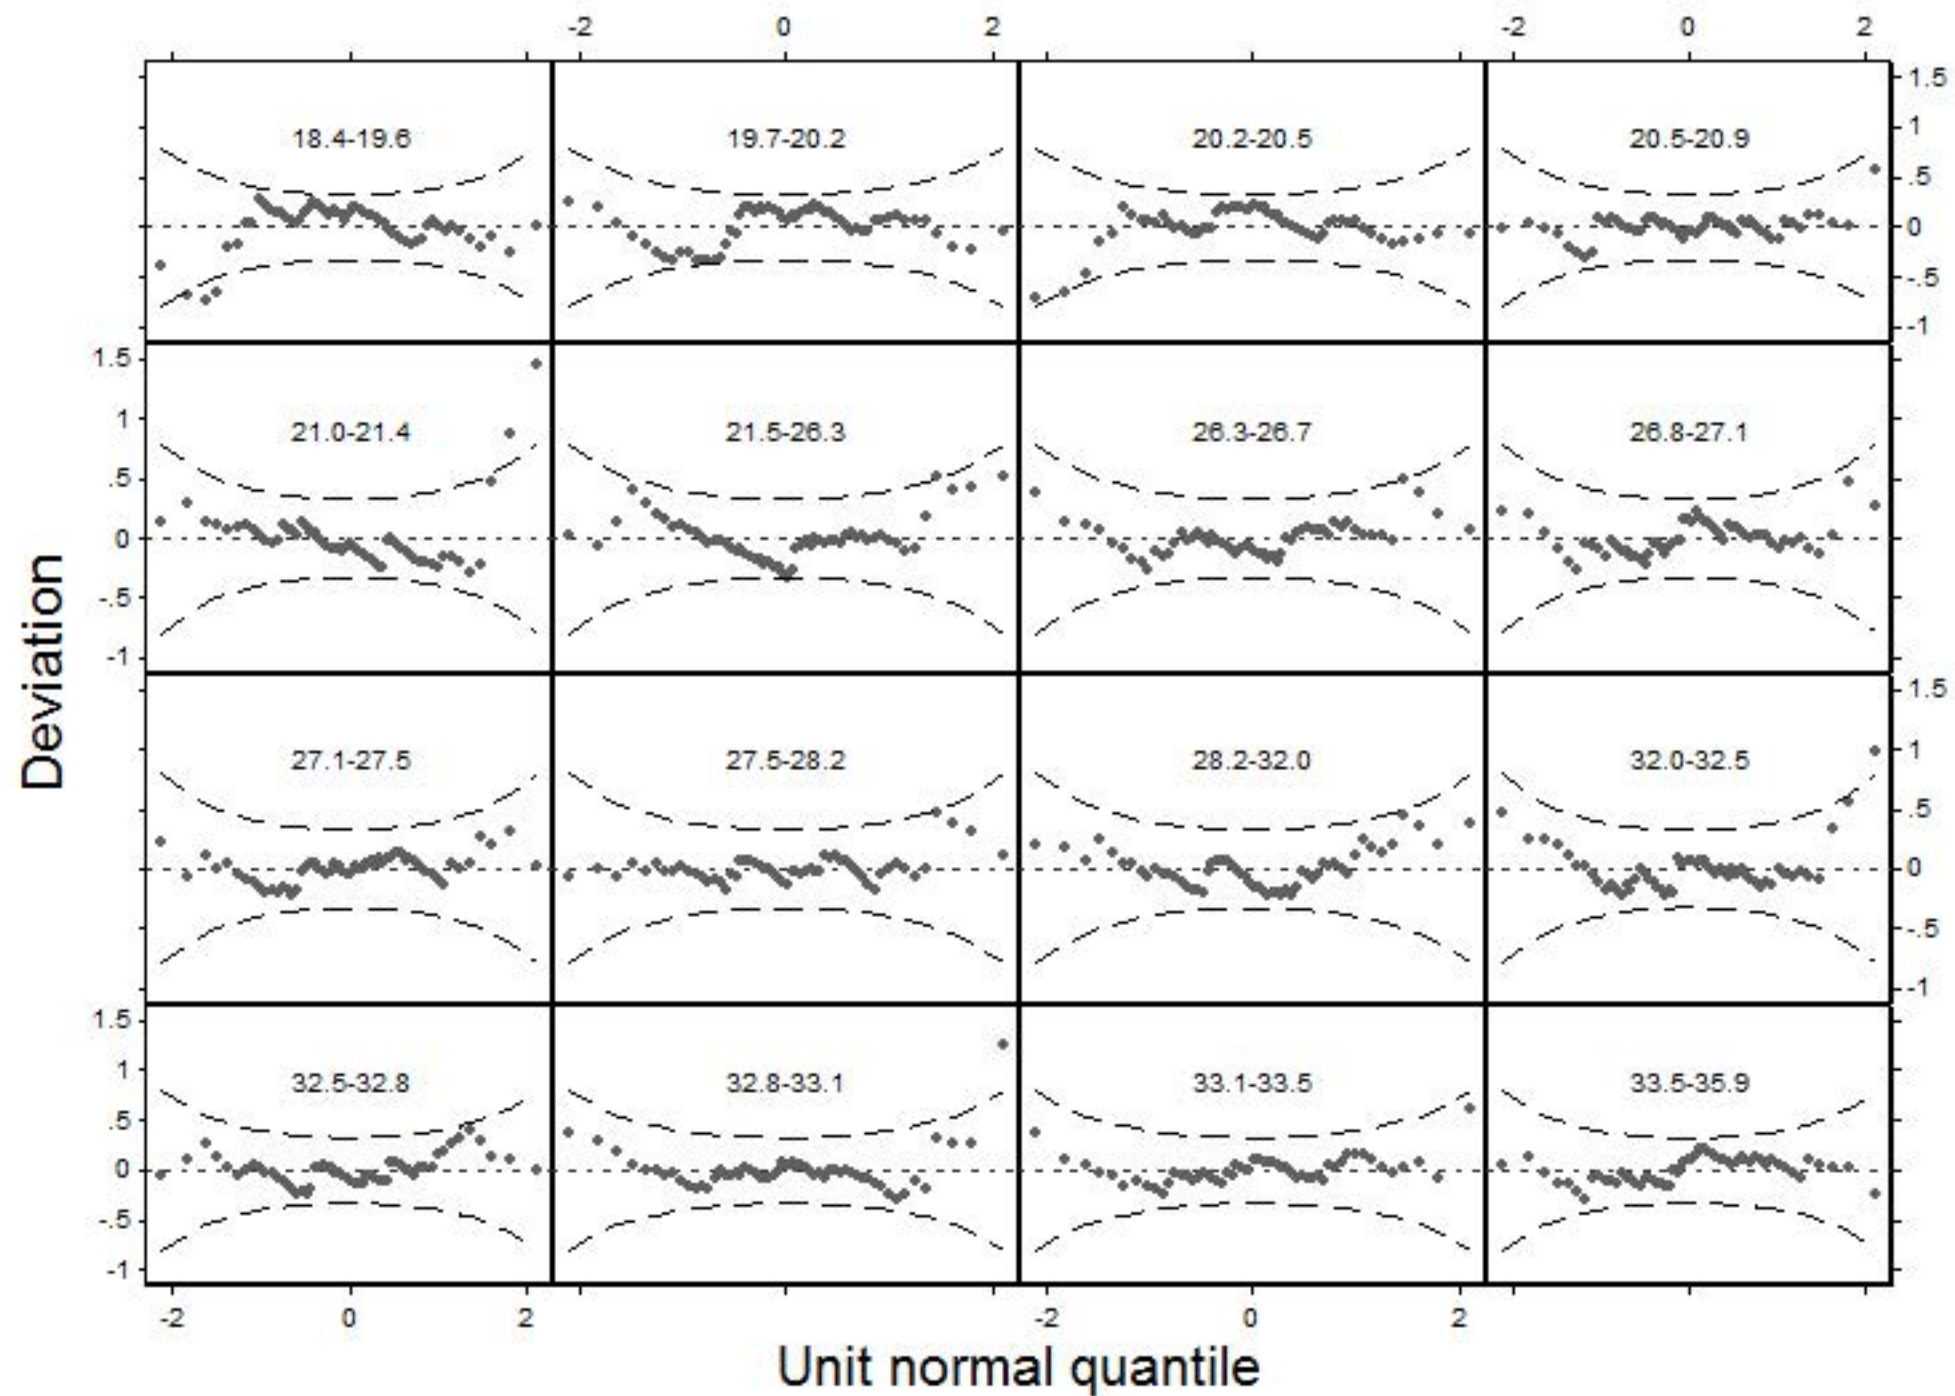

Supplement: MOESM5 [file 9743236]
